# Supplementary material for: Ergot alkaloids contribute to virulence in an insect model of invasive aspergillosis
Source: PubMed Central journal article supplement (PMC5567044; doi:10.1038/s41598-017-09107-2), 2017-08-21
Supplement: 41598_2017_9107_MOESM1_ESM.pdf [file 41598_2017_9107_MOESM1_ESM.pdf]

## Supplementary Information

**Title:** Ergot alkaloids contribute to virulence in an insect model of invasive aspergillosis

**Author list:** Daniel G. Panaccione and Stephanie L. Arnold

**Table S1. PCR primers and products**

| Primer combination           | Primer sequences<br>5'→3'                         | Product description                                                  | Amplicon length (bp) |
|------------------------------|---------------------------------------------------|----------------------------------------------------------------------|----------------------|
| gAf +<br>pAr                 | GAGAACCTTGGTGAGTTGCCC +<br>GTTAGCTCACTCATTAGGCACC | Bridges integration border on<br><i>easA</i> side                    | 2396                 |
| pGf +<br>gGr                 | GATGGCCCACTACGTGAACC +<br>CTGTGGATGCGACTATTCTCC   | Bridges integration border on<br><i>easG</i> side                    | 1892                 |
| <i>albF</i> +<br><i>albR</i> | GGTCGGCGCTCCTCAAATGG +<br>GGATATCCTTCACGCTCGACC   | Part of <i>N. fumigata alb1</i> gene<br>as template positive control | 1595                 |

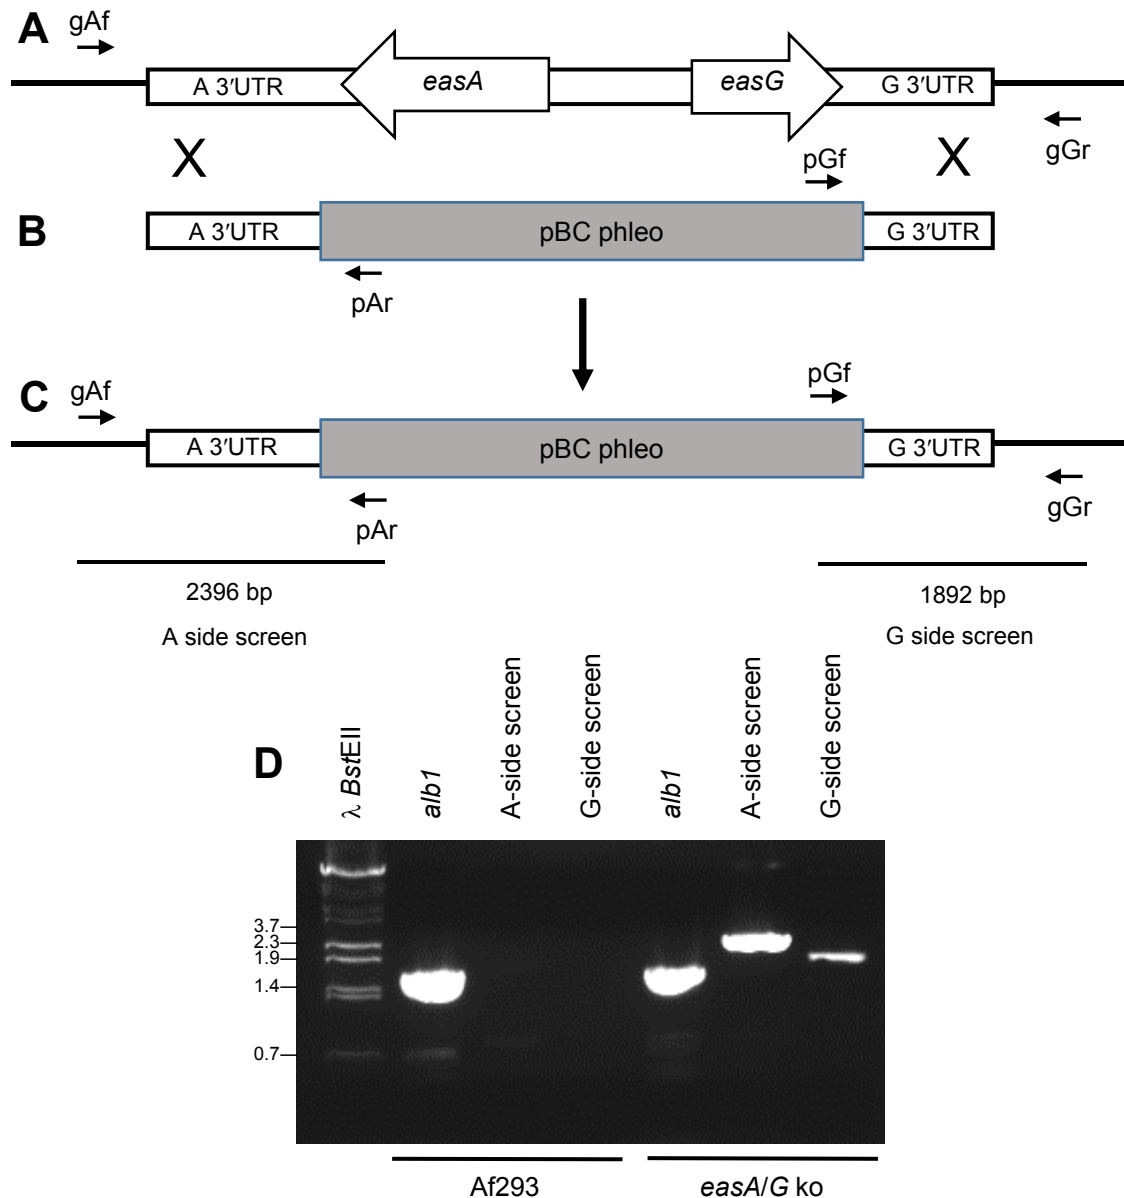

**Fig. S1. Construction and verification of *easA/G* knockout in *N. fumigata* Af293.** (A) Region of the *N. fumigata eas* cluster targeted for recombination is shown as a white rectangle. Position and orientation of coding sequences of *easA* and *easG* are indicated with enlarged arrows. The 3' untranslated regions of *easA* (A 3'UTR) and *easG* (G 3'UTR) targeted for recombination are labelled. (B) Gene knockout construct containing 1997 bp of *easA* 3'UTR (coordinates 4774858-4776855 on Af293 chromosome 2; accession NC\_007195) and 1299 bp of *easG* 3'UTR (coordinates 4780007-4781306 on Af293 chromosome 2; accession NC\_007195) attached at *ClaI* and *SpeI* sites, respectively, of pBC-phleo (Silar<sup>1</sup>; Fungal Genetics Stock Center, Manhattan, KS, USA). (C) Homologous recombination of the construct replaces *easA* and *easG* with pBC-phleo and brings primer annealing sites for indicated primers (Table S1) within specified distances of one another. (D) PCR products derived from template DNA from Af293 or an *easA/G* knockout strain with indicated primer pairs (Table S1). The *alb1* gene served as a positive control for amplifiable template DNA. Primer annealing sites for A side screen and G side screen are only near each other in the knockout strain. Lengths of relevant fragments of *BstEII*-digested bacteriophage lambda DNA are indicate at left. Illustrated features in panels A, B, and C are not drawn to scale.

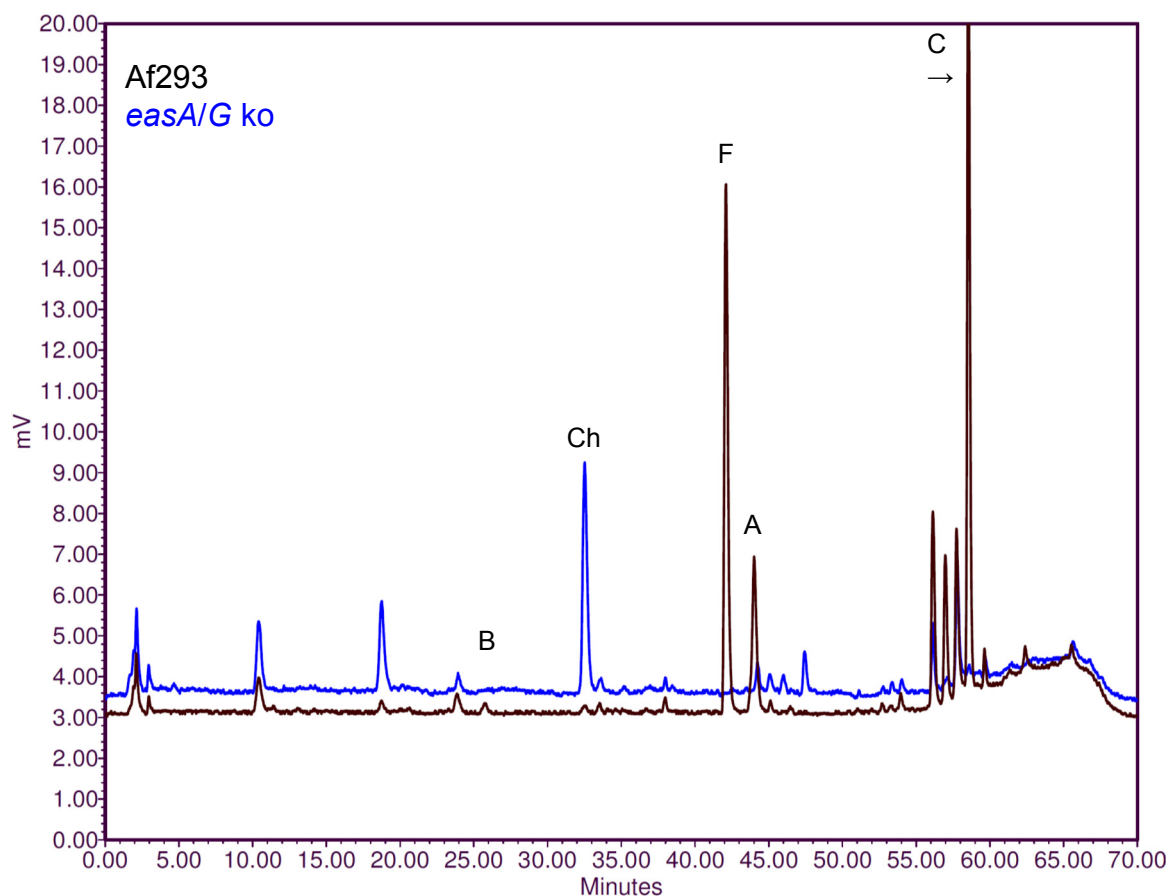

**Fig. S2. Analysis of *easA/G* knockout of *N. fumigata* Af293 by high performance liquid chromatography (HPLC) with fluorescence detection.** Alkaloids were extracted with HPLC-grade methanol from a plug of a malt extract agar culture containing 50-mm<sup>2</sup> of surface area. Fluorescence was monitored at 372 nm after exciting at 272 nm according to described methods<sup>2</sup>. The chromatogram from the *easA/G* knockout strain is coloured blue, whereas that from the parent strain Af293 is black. Peaks corresponding to characterized ergot alkaloids are indicated with the following abbreviations: B, fumigaclavine B; Ch, chanoclavine-I; F, festuclavine; A, fumigaclavine A; and, C, fumigaclavine C. The data are consistent with the phenotype of the *easA* knockout of *N. fumigata* described previously<sup>3,4</sup>.

### References for Supplementary Information

1. Silar, P. Two new easy to use vectors for transformations. *Fungal Genet. Rep.* **42**, 73 (1995).
2. Panaccione, D. G., Ryan, K. L., Schardl, C. L. & Florea, S. Analysis and modification of ergot alkaloid profiles in fungi. *Methods Enzymol.* **515**, 267-290 (2012).
3. Coyle, C. M., Cheng, J. Z., O'Connor, S. E. & Panaccione, D. G. An old yellow enzyme gene controls the branch point between *Aspergillus fumigatus* and *Claviceps purpurea* ergot alkaloid pathways. *Appl. Environ. Microbiol.* **76**, 3898-3903 (2010).
4. Cheng, J. Z., Coyle, C. M., Panaccione, D. G. & O'Connor, S. E. A role for old yellow enzyme in ergot alkaloid biosynthesis. *J. Amer. Chem. Soc.* **132**, 1776-1777 (2010).
